# Supplementary material for: Uncommon thioether-modified metal–organic frameworks with unique selective CO2sorption and efficient catalytic conversion
Source: Royal Society of Chemistry journal article supplement (doi:10.1039/d0ce01784a), 2020-12-28
Supplement: d0ce01784a1.pdf [file d0ce01784a1.pdf]

## ***Electronic Supplementary Information***

### **Uncommon thioether modified metal-organic frameworks with unique selective CO<sub>2</sub> sorption and efficient catalytic conversion**

Wen-Juan Wang, Jiao Liu, Yang-Tian Yan, Xiao-Li Yang, Wen-Yan Zhang\*, Guo-Ping Yang\*, and  
Yao-Yu Wang

*Key Laboratory of Synthetic and Natural Functional Molecule of the Ministry of Education,  
Shaanxi Key Laboratory of Physico-Inorganic Chemistry, College of and Materials Science,  
Northwest University, Xi'an 710127, P.R. China.*

# Contents

**Table S1.** Selected bond lengths (Å) and bond angles (°) for **1-2**.

**Table S2.** Comparison of CO<sub>2</sub> separation performances at 298 K of **1a** and other MOFs.

**Fig. S1** Coordination mode of L<sup>3-</sup> in **1-2**.

**Fig. S2** (a) The tetranuclear cluster in **1**. (b) The trinuclear cluster in **2**.

**Fig. S3** (a) The 3D porous framework of complex **2**. (b) Topological net of complex **2**.

**Fig. S4** The PXRD patterns of the as-synthesized products **1** (a) and **2** (b).

**Fig. S5** The TGA curves for **1** and **2**.

**Fig. S6** FT-IR spectras for **1** and **2**.

**Fig. S7** PSD obtained from the 195 K isotherms using H-W mode of **1a**.

**Fig. S8** CO<sub>2</sub> adsorption isotherms of **1a** at 273K with fitting by L-F model; CO<sub>2</sub> adsorption isotherms of **1a** at 298K with fitting by L-F model.

**Fig. S9** IAST adsorption selectivity of **1a** for equimolar mixtures of CO<sub>2</sub> and CH<sub>4</sub> at 273/298 K.

**Fig. S10** (a) CO<sub>2</sub> adsorption isotherms for **1a** with fitting by Virial 2 model. (b) Isothermic heat of CO<sub>2</sub> adsorption for **1a** estimated by the virial equation from the adsorption isotherms 298 K.

**Fig. S11** Cyclic experiment on the cycloaddition reaction of CO<sub>2</sub> and epichlorohydrin.

**Fig. S12** PXRD patterns of **1a** after four runs catalytic reactions.

## Experimental section

**Measurement.** The reagents and solvents were purchased without purification in the experiments. Elemental analyses (C, H, N) were tested on Perkin-Elmer 2400 C elemental analyzer. Infrared spectra were tested on Bruker EQUINOX-55 spectrophotometer in 4000-400  $\text{cm}^{-1}$ . Powder X-ray diffraction patterns were tested through Bruker D8 ADV ANCE X-ray powder diffractometer (Cu-K $\alpha$ ,  $\lambda = 1.5418 \text{ \AA}$ ) with  $2\theta$  at 5-50°. The thermogravimetric analyses were tested on NETZSCH STA 449C microanalyzer ( $\text{N}_2$  atmosphere,  $10 \text{ }^\circ\text{C min}^{-1}$ ) at 35~800  $^\circ\text{C}$ . Gas sorption isotherms were acquired by ASAP 2020 M adsorption equipment.

**Synthesis of H<sub>3</sub>L.** 5-((carboxy-3-ylthio) methyl) isophthalic acid was prepared by mixing 3-mercaptobenzoic acid and 5-(bromomethyl) isophthalic acid in acetone at refluxing temperature for 24 h. After cooling down to room temperature, the white solid of H<sub>3</sub>L was collected by filtration with a yield of 88%. IR/ $\text{cm}^{-1}$  (KBr): 3438 (m), 3084 (m), 2972 (w), 2790 (w), 2517 (m), 2148 (w), 2031 (w), 1865 (w), 1672 (s), 1620 (s), 1475 (s), 1348 (m), 1265 (s), 1209 (s), 1105 (s), 974 (m), 912 (m), 860 (w), 812 (s), 771 (s), 687 (s), 611 (m), 484 (w), 426 (m). <sup>1</sup>HNMR (400 MHz, DMSO)  $\delta$  13.18 (s, 3H), 8.32 (t,  $J = 1.6 \text{ Hz}$ , 1H), 8.13 (d,  $J = 1.5 \text{ Hz}$ , 2H), 7.81 (t,  $J = 1.6 \text{ Hz}$ , 1H), 7.76 - 7.71 (m, 1H), 7.61 - 7.57 (m, 1H), 7.42 (t,  $J = 7.8 \text{ Hz}$ , 1H), 4.45 (s, 2H).

**X-ray Crystal Structure Determination.** The single crystal X-ray diffractions were tested on Bruker SMART APEX II CCD diffractometer equipped with graphite monochromated Mo-K $\alpha$  radiation ( $\lambda = 0.71073 \text{ \AA}$ ) via  $\phi/\omega$  scan method. The diffraction data were corrected for Lorentz and polarization effects for empirical absorption based on multi-scan. The structures were solved by the direct methods and refined on  $F^2$  via *SHELXTL* program. The anisotropic thermal parameters were applied to non-hydrogen atoms. The hydrogen atoms of ligands were calculated and added at ideal positions. The crystallographic data of complex **1** and **2** are summarized in Table 1, and the selected bond lengths and angles are listed in Table S1. The CCDC numbers are 2012400 for **1** and 2044112 for **2**, respectively.

**Gas sorption measurements.** Before gas sorption, **1** was soaked in dichloromethane ( $\text{CH}_2\text{Cl}_2$ ) for three days, then heating the sample under vacuum to get **1a**.

**Catalytic Experiment.** The catalytic reactions were conducted at the ambient temperature and 0.1 MPa pressure under solvent free environment in a 10 mL Schlenk tube using epoxides (20 mmol) with  $\text{CO}_2$  catalyzed by **1a** and a cocatalyst of tetra-*n*-tertbutylammonium bromide (TBAB 2 mmol) under stirring for 6 h (800 rpm). <sup>1</sup>H NMR analysis was used to monitor the products and yields of products.

**Table S1** Selected bond lengths (Å) and bond angles (°) for **1-2**

| <b>Complex 1</b>     |            |                      |            |
|----------------------|------------|----------------------|------------|
| Cu(1)-O(1)           | 1.9747(19) | O(4)#3-Cu(1)-O(1)    | 170.65(8)  |
| Cu(1)-O(1)#1         | 1.9667(18) | O(4)#3-Cu(1)-O(1)#1  | 93.54(8)   |
| Cu(1)-O(2)           | 2.2389(19) | O(4)#3-Cu(1)-N(2)    | 87.74(9)   |
| Cu(1)-O(4)#3         | 1.917(2)   | N(2)-Cu(1)-Cu(1)#1   | 132.30(7)  |
| Cu(1)-N(2)           | 2.007(2)   | N(2)-Cu(1)-O(2)      | 95.31(9)   |
| Cu(1)-Cu(1)#1        | 2.9656(7)  | O(1)#1-Cu(2)-O(3)    | 88.58(8)   |
| Cu(2)-O(1)#1         | 1.9430(18) | O(1)#1-Cu(2)-O(6)#2  | 94.32(8)   |
| Cu(2)-O(3)           | 1.966(2)   | O(1)#1-Cu(2)-O(5)#3  | 95.59(8)   |
| Cu(2)-O(6)#2         | 1.949(2)   | O(1)#1-Cu(2)-N(1)    | 172.61(10) |
| Cu(2)-O(5)#3         | 2.208(2)   | O(3)-Cu(2)-O(5)#3    | 106.92(9)  |
| Cu(2)-N(1)           | 1.996(2)   | O(3)-Cu(2)-N(1)      | 86.97(9)   |
| O(2)-Cu(1)-Cu(1)#1   | 96.17(5)   | O(6)#2-Cu(2)-O(3)    | 149.96(9)  |
| O(1)-Cu(1)-Cu(1)#1   | 41.10(5)   | O(6)#2-Cu(2)-O(5)#3  | 102.55(9)  |
| O(1)#1-Cu(1)-Cu(1)#1 | 41.30(5)   | O(6)#2-Cu(2)-N(1)    | 86.62(9)   |
| O(1)#1-Cu(1)-O(2)    | 101.80(7)  | N(1)-Cu(2)-O(5)#3    | 91.35(9)   |
| O(1)-Cu(1)-O(2)      | 87.58(7)   | C(20)-O(6)-Cu(2)#7   | 128.43(18) |
| O(1)#1-Cu(1)-O(1)    | 82.39(8)   | C(14)-O(5)-Cu(2)#6   | 127.22(19) |
| O(1)#1-Cu(1)-N(2)    | 162.21(9)  | C(22)-N(2)-Cu(1)     | 122.9(2)   |
| O(1)-Cu(1)-N(2)      | 93.58(9)   | C(26)-N(2)-Cu(1)     | 119.3(2)   |
| O(4)#3-Cu(1)-Cu(1)#1 | 134.26(7)  | C(2)-N(1)-Cu(2)      | 122.9(2)   |
| O(4)#3-Cu(1)-O(2)    | 101.52(8)  | C(6)-N(1)-Cu(2)      | 120.3(2)   |
| C(1)-O(2)-Cu(1)      | 117.57(17) | Cu(2)#1-O(1)-Cu(1)#1 | 108.58(9)  |
| Cu(1)#1-O(1)-Cu(1)   | 97.60(8)   | Cu(2)#1-O(1)-Cu(1)   | 115.77(9)  |
| Cu(1)#1-O(1)-H(1)    | 118.2      | Cu(2)#1-O(1)-H(1)    | 102.6      |
| Cu(1)-O(1)-H(1)      | 114.6      | C(1)-O(3)-Cu(2)      | 126.27(19) |
| C(14)-O(4)-Cu(1)#6   | 125.03(19) |                      |            |

Symmetry codes: #1 -x+2, -y+2, -z; #2 x+1, y, z; #3 x, y+1, z; #4 -x+1, -y+3, -z; #5 -x+2, -y+1, -z+1; #6 x, y-1, z; #7 x-1, y, z.

---

**Complex 2**

---

|                     |            |                     |            |
|---------------------|------------|---------------------|------------|
| Mn(1)-O(1)          | 2.1613(18) | O(1)#1-Mn(1)-O(5)#3 | 88.11(7)   |
| Mn(1)-O(1)#1        | 2.1614(18) | O(1)-Mn(1)-O(5)#2   | 88.11(7)   |
| Mn(1)-O(5)#2        | 2.2058(17) | O(1)-Mn(1)-O(5)#3   | 91.89(7)   |
| Mn(1)-O(5)#3        | 2.2058(17) | O(1)-Mn(1)-O(6)#4   | 92.94(7)   |
| Mn(1)-O(6)#4        | 2.1671(16) | O(1)#1-Mn(1)-O(6)#4 | 87.06(7)   |
| Mn(1)-O(6)#5        | 2.1671(16) | O(1)-Mn(1)-O(6)#5   | 87.06(7)   |
| Mn(2)-O(2)#6        | 2.1204(18) | O(1)#1-Mn(1)-O(6)#5 | 92.94(7)   |
| Mn(2)-O(3)          | 2.0989(18) | O(5)#3-Mn(1)-O(5)#2 | 180.0      |
| Mn(2)-O(4)          | 2.1756(19) | O(6)#4-Mn(1)-O(5)#2 | 91.69(7)   |
| Mn(2)-O(6)#7        | 2.2370(17) | O(6)#5-Mn(1)-O(5)#3 | 91.69(7)   |
| Mn(2)-O(7)#7        | 2.482(2)   | O(6)#5-Mn(1)-O(5)#2 | 88.31(7)   |
| Mn(2)-N(2)          | 2.232(2)   | O(6)#4-Mn(1)-O(5)#3 | 88.31(7)   |
| O(1)-Mn(1)-O(1)#1   | 180.0      | O(6)#4-Mn(1)-O(6)#5 | 180.00(10) |
| O(1)#1-Mn(1)-O(5)#2 | 91.89(7)   | O(2)#6-Mn(2)-O(4)   | 94.63(8)   |
| O(2)#6-Mn(2)-O(6)#7 | 108.14(7)  | O(3)-Mn(2)-N(2)     | 86.24(8)   |
| O(2)#6-Mn(2)-O(7)#7 | 162.91(7)  | O(4)-Mn(2)-O(6)#7   | 86.34(7)   |
| O(2)#6-Mn(2)-N(2)   | 115.34(8)  | O(4)-Mn(2)-O(7)#7   | 84.51(8)   |
| O(3)-Mn(2)-O(2)#6   | 89.39(8)   | O(4)-Mn(2)-N(2)     | 87.45(8)   |
| O(3)-Mn(2)-O(4)     | 173.52(7)  | O(6)#7-Mn(2)-O(7)#7 | 54.78(6)   |
| O(3)-Mn(2)-O(6)#7   | 97.25(7)   | N(2)-Mn(2)-O(6)#7   | 136.42(8)  |
| O(3)-Mn(2)-O(7)#7   | 93.14(8)   | N(2)-Mn(2)-O(7)#7   | 81.70(8)   |

---

Symmetry codes: #1  $-x+3/2, -y+1/2, -z+2$ ; #2  $-x+3/2, -y+1/2, -z+1$ ; #3  $x, y, z+1$ ; #4  $x, -y+1, z+1/2$ ; #5  $-x+3/2, y-1/2, -z+3/2$ ; #6  $x, y, z-1$ ; #7  $-x+3/2, y-1/2, -z+1/2$ ; #8  $-x+1, y, -z+1/2$ ; #9  $-x+3/2, y+1/2, -z+3/2$ ; #10  $-x+3/2, y+1/2, -z+1/2$ .

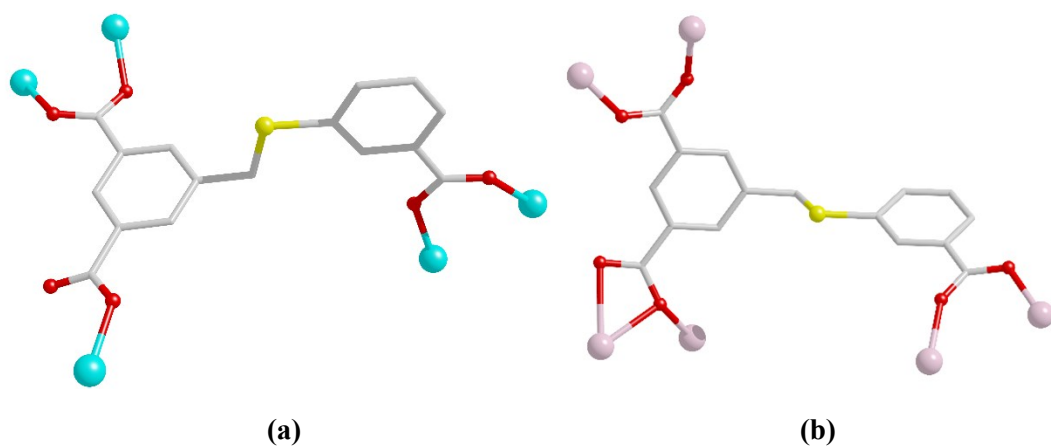

**Fig. S1** Coordination mode of  $L^{3-}$  in **1-2**.

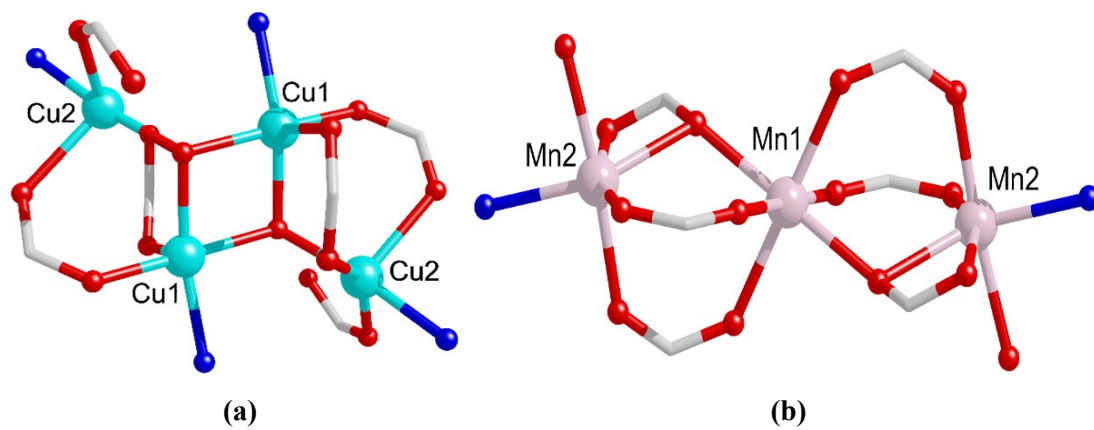

**Fig. S2** (a) The tetranuclear cluster in **1**. (b) The trinuclear cluster in **2**.

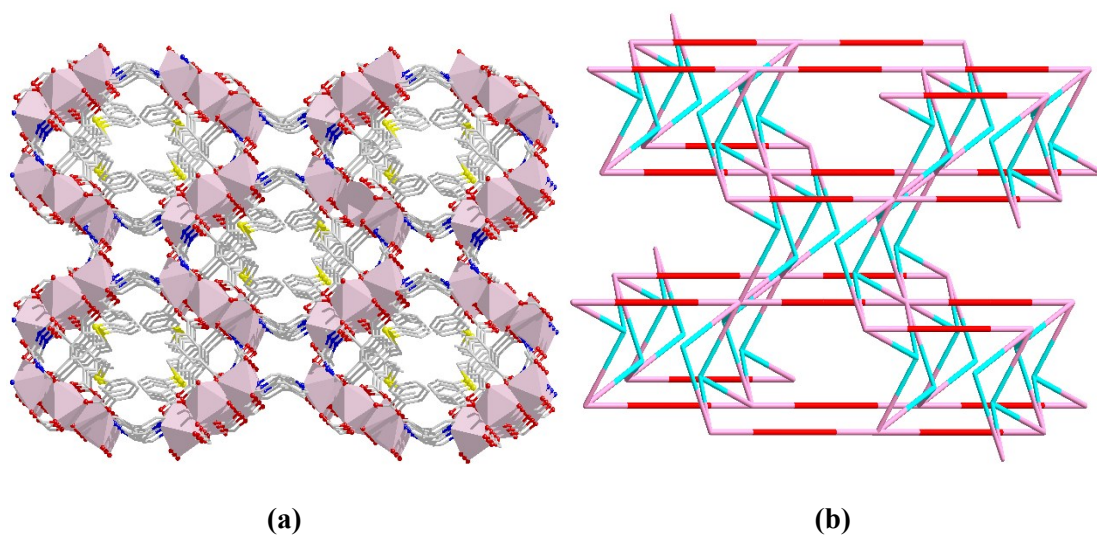

**Fig. S3** (a) The 3D porous framework of **2**. (b) Topological net of **2**.

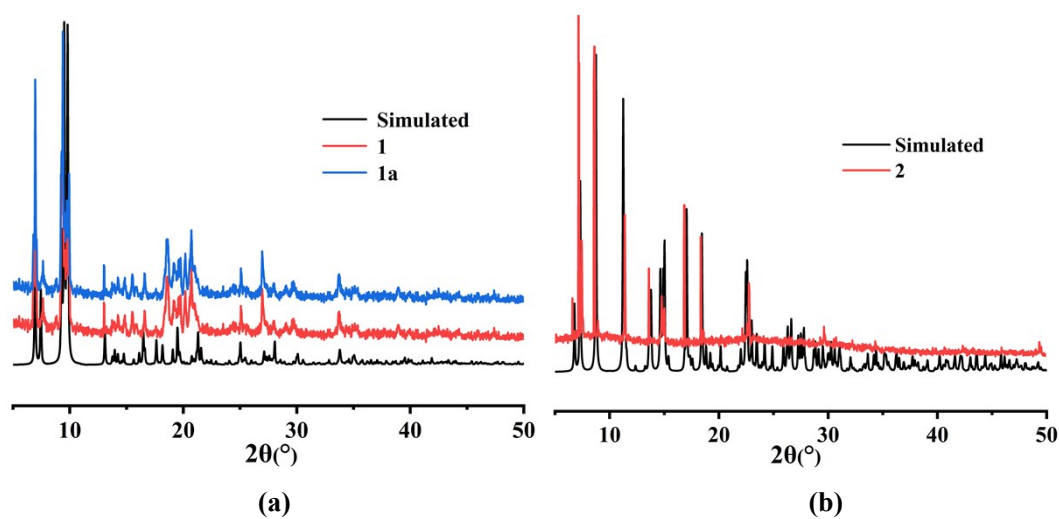

Fig. S4 The PXRD patterns of the as-synthesized products **1** (a) and **2** (b).

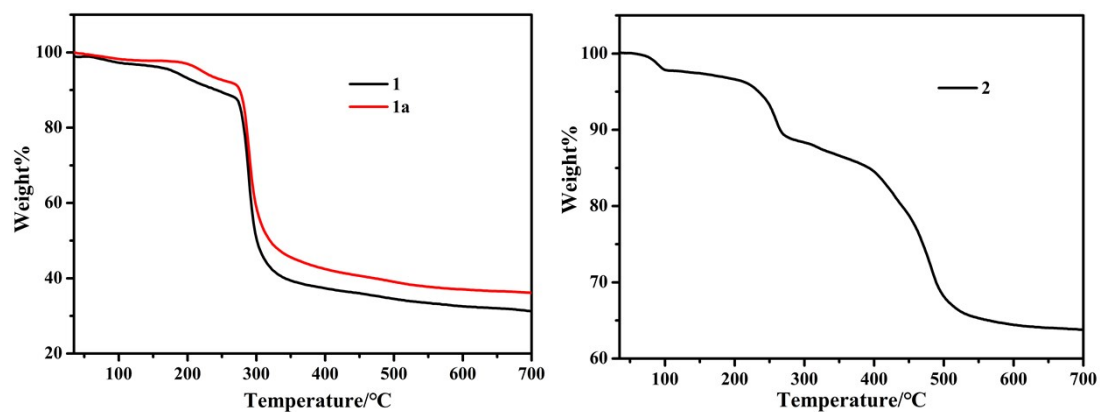

Fig. S5 The TGA curves for **1** and **2**.

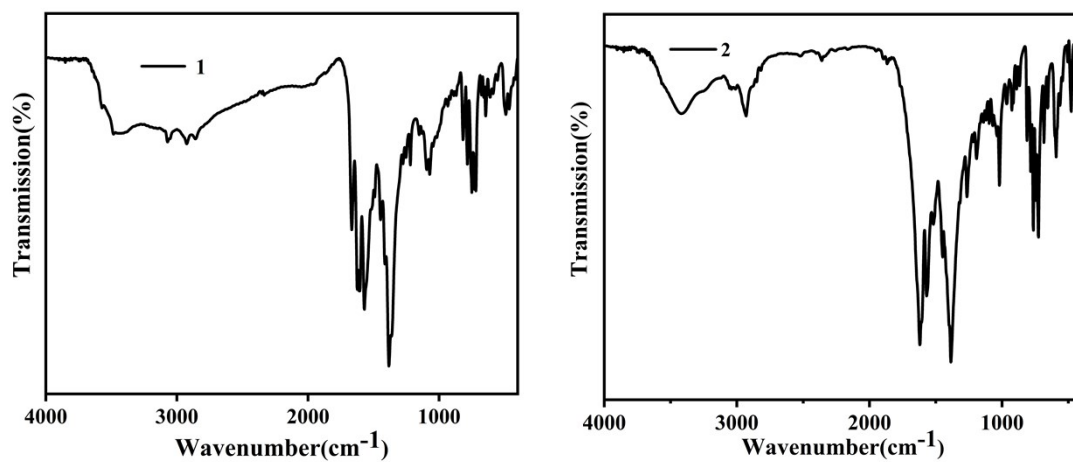

Fig. S6 FT-IR spectras for **1** and **2**.

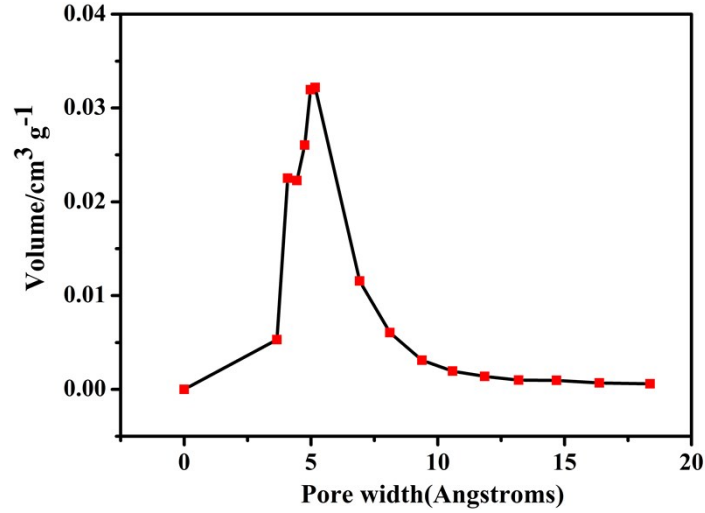

Fig. S7 PSD obtained from the 195 K isotherms using H-W mode of **1a**.

### IAST adsorption selectivity calculation

The experimental isotherm data for pure CO<sub>2</sub> and CH<sub>4</sub> (measured at 273 K and 298 K) were fitted using a Langmuir-Freundlich (L-F) model.

$$q = \frac{a * b * p^c}{1 + b * p^c}$$

Where  $q$  and  $p$  are adsorbed amounts and pressures of component  $i$ , respectively. The adsorption selectivity for binary mixtures of CO<sub>2</sub>/CH<sub>4</sub> at 273 K and 298 K, defined by

$$S_{ads} = (q_1/q_2)/(p_1/p_2)$$

Where  $q_i$  is the amount of  $i$  adsorbed and  $p_i$  is the partial pressure of  $i$  in the mixture.

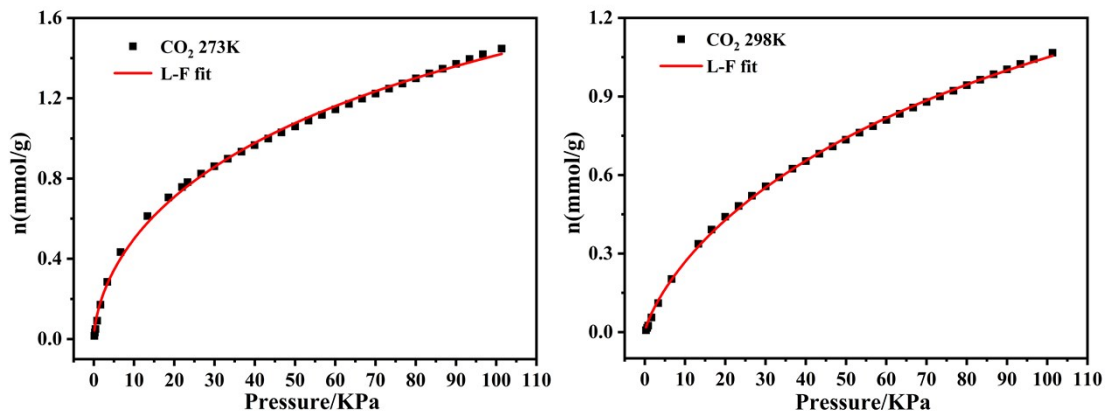



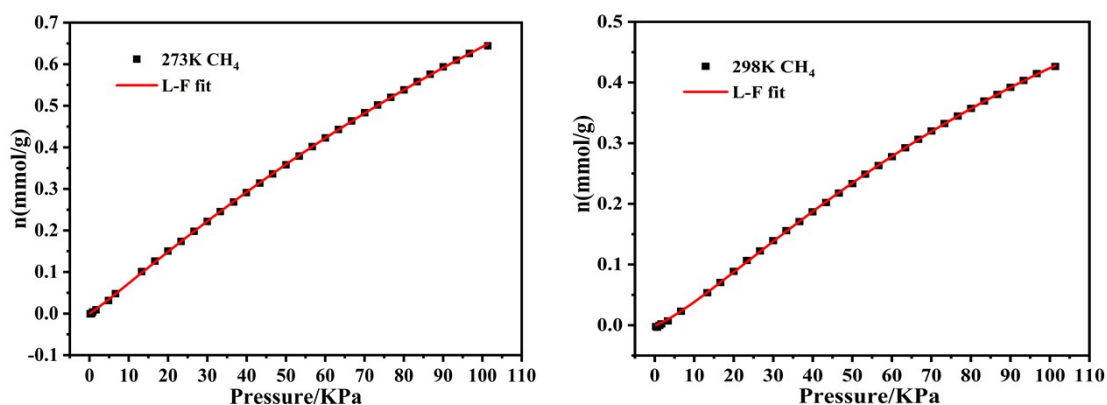

**Fig. S8** CO<sub>2</sub> adsorption isotherms of **1a** at 273K with fitting by L-F model:  $a= 3.51934$ ,  $b= 0.04067$ ,  $c = 0.60904$ ,  $\text{Chi}^2 = 3.72175\text{E-}4$ ,  $R^2 = 0.99823$ ; CO<sub>2</sub> adsorption isotherms of **1a** at 298K with fitting by L-F model:  $a=2.46738$ ,  $b= 0.02008$ ,  $c = 0.78313$ ,  $\text{Chi}^2 = 8.0536\text{E-}5$ ,  $R^2 = 0.99932$ ; CH<sub>4</sub> adsorption isotherms of **1a** at 273K with fitting by L-F model:  $a = 2.17203$ ,  $b = 0.00287$ ,  $c = 1.08228$ ,  $\text{Chi}^2 = 3.08297\text{E-}6$ ,  $R^2 = 0.99994$ ; CH<sub>4</sub> adsorption isotherms of **1a** at 298K with fitting by L-F model:  $a = 0.99848$ ,  $b = 0.00217$ ,  $c = 1.26605$ ,  $\text{Chi}^2 = 2.49806\text{E-}6$ ,  $R^2 = 0.99988$ .

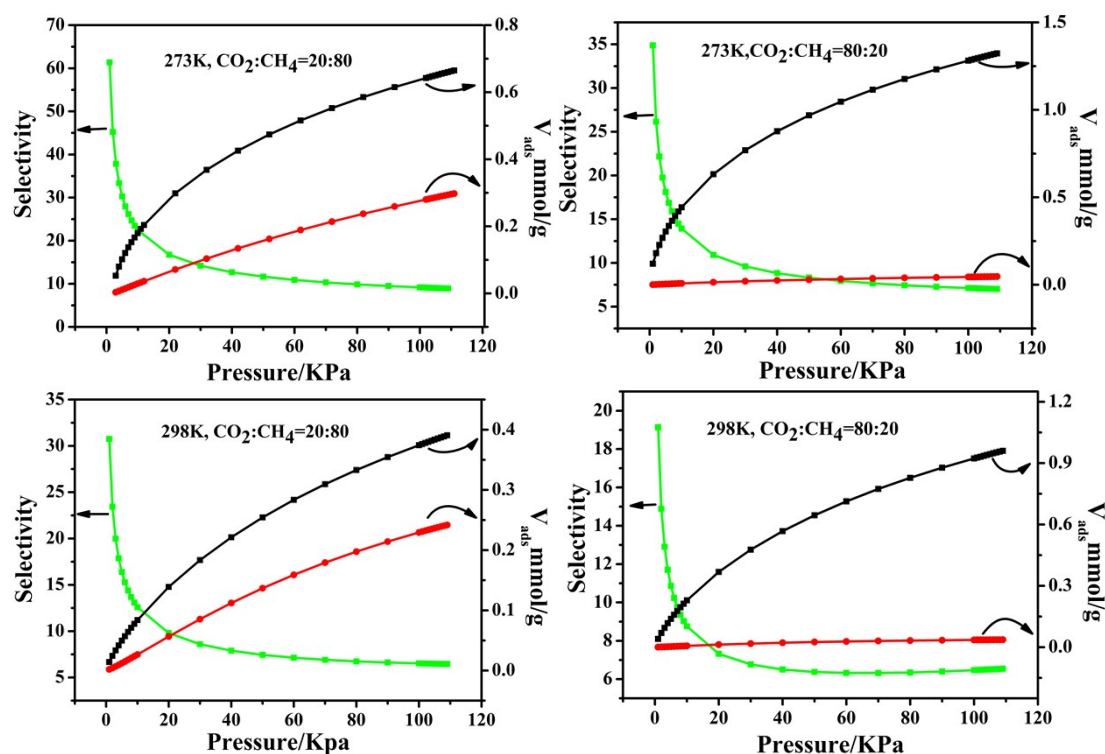

**Fig. S9** IAST adsorption selectivity of **1a** for equimolar mixtures of CO<sub>2</sub> and CH<sub>4</sub> at 273 K and 298 K.

### Calculation of sorption heat for CO<sub>2</sub> uptake using Virial 2 model

$$\ln P = \ln N + 1/T \sum_{i=0}^m aiN^i + \sum_{i=0}^n biN^i \quad Q_{st} = -R \sum_{i=0}^m aiN^i$$

The above equation was applied to fit the combined CO<sub>2</sub> isotherm data for desolvated **1a** at 273 K

and 298 K, where  $P$  is the pressure,  $N$  is the adsorbed amount,  $T$  is the temperature,  $a_i$  and  $b_i$  are virial coefficients, and  $m$  and  $n$  are the number of coefficients used to describe the isotherms.  $Q_{st}$  is the coverage-dependent enthalpy of adsorption and  $R$  is the universal gas constant.

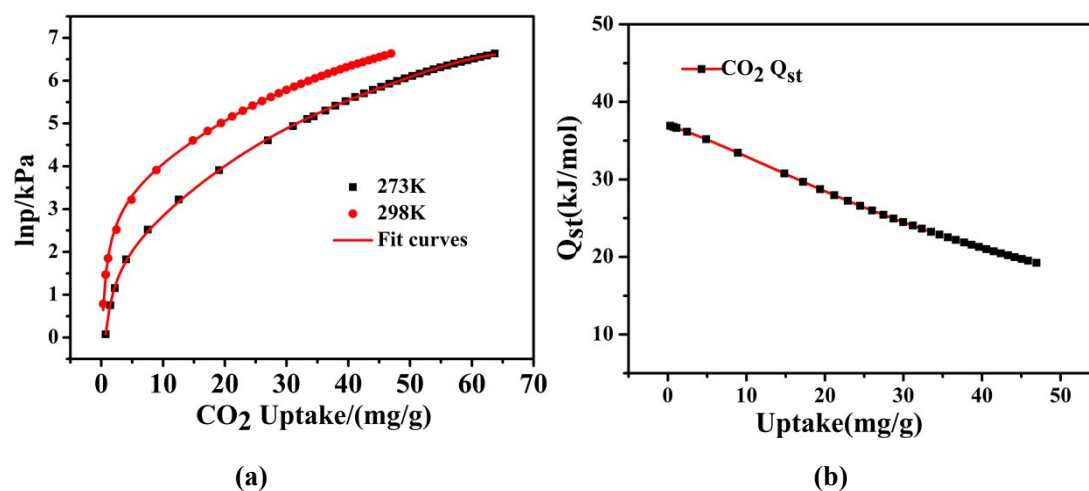

**Fig. S10** (a) CO<sub>2</sub> adsorption isotherms for **1a** with fitting by Virial 2 model. Fitting results:  $a_0 = -4451.39526$ ,  $a_1 = 39.49374$ ,  $a_2 = 1.38865$ ,  $a_3 = -0.05355$ ,  $a_4 = 7.62549E-4$ ,  $a_5 = -4.11817E-6$ ;  $b_0 = -11.32327$ ,  $b_1 = 0.00254$ ,  $\chi^2 = 0.00451$ ,  $R^2 = 0.99966$ . (b) Isothermic heat of CO<sub>2</sub> adsorption for **1a** estimated by the virial equation from the adsorption isotherms 298 K.

**Table S2** Comparison of CO<sub>2</sub> separation performances at 298 K of **1a** and other MOFs.

| MOF                                                                                   | Selectivity | Ref.             |
|---------------------------------------------------------------------------------------|-------------|------------------|
| $[\text{Cu}_{0.5}(\text{bpdado})_{0.5}(\text{bpe})_{0.5}] \cdot 3\text{H}_2\text{O}$  | 15.5        | 1                |
| $[\text{H}_2\text{N}(\text{CH}_3)_2]_2[\text{Cu}(\text{L})]$                          | 30.8        | 2                |
| $\text{Cu}_2(\text{pbpta})$                                                           | 6           | 3                |
| Cu-TDPDA                                                                              | 13.8        | 4                |
| $[\text{Cu}(\text{bpy})_2(\text{SiF}_6)]$                                             | 10.5        | 5                |
| TIFSIX-1-Cu                                                                           | 11          | 6                |
| $(\text{Cu}_4\text{I}_4)[\text{Cu}_2\text{-PDC}_2(\text{H}_2\text{O})_2]$             | 8           | 7                |
| $[\text{Cu}(\text{INIA})]$                                                            | 4.3         | 8                |
| $\{[\text{Cu}_2(\text{L})(4,4'\text{-bipy})(\text{OH})] \cdot \text{H}_2\text{O}\}_n$ | 22.5        | <b>This work</b> |

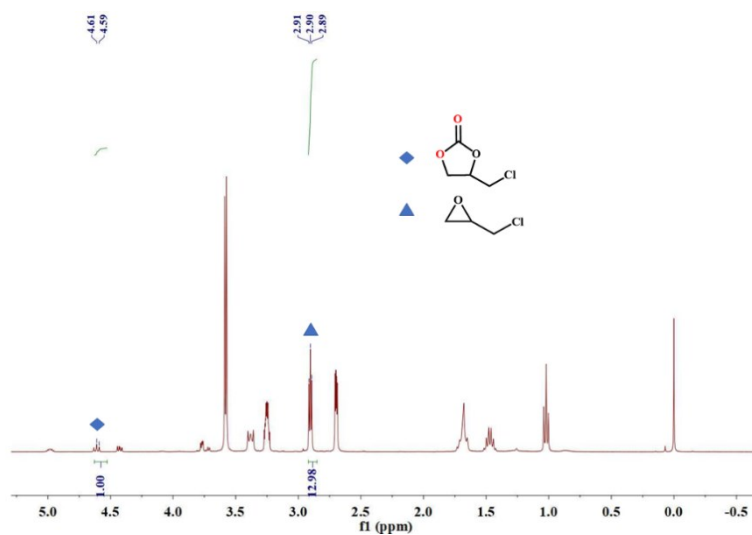

(a)  $^1\text{H}$  NMR spectrum of cyclic carbonate and epoxide with complex **1a** and TBAB (Table 2, entry 1).

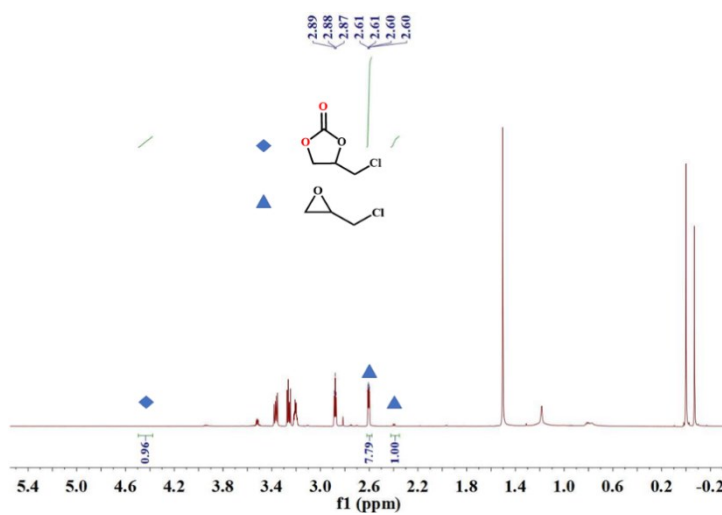

(b)  $^1\text{H}$  NMR spectrum of cyclic carbonate and epoxide with complex **1a** and TBAB (Table 2, entry 2).

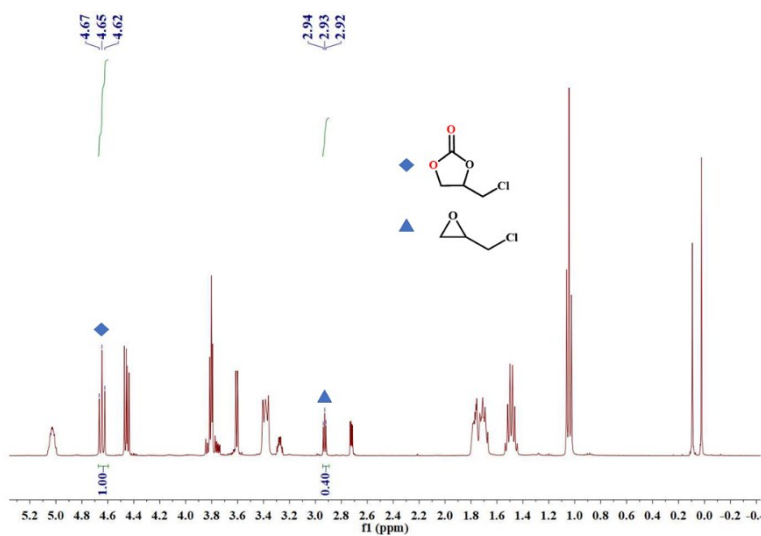

(c)  $^1\text{H}$  NMR spectrum of cyclic carbonate and epoxide with complex **1a** and TBAB (Table 2, entry 3).

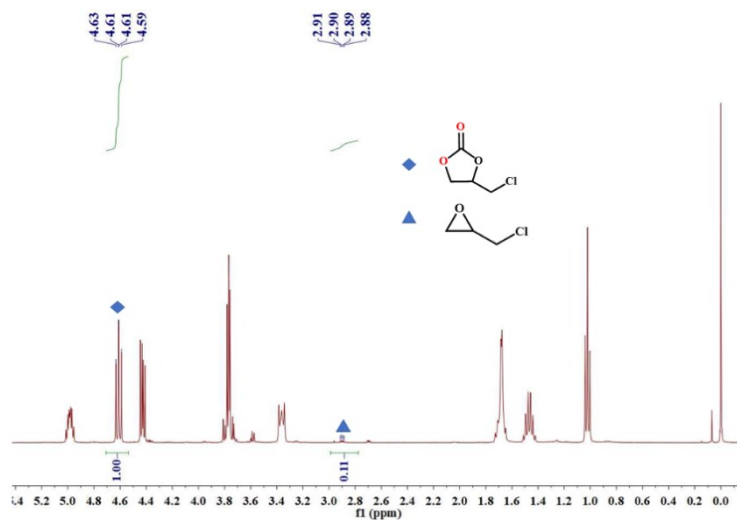

(d)  $^1\text{H}$  NMR spectrum of cyclic carbonate and epoxide with complex **1a** and TBAB (Table 2, entry 4).

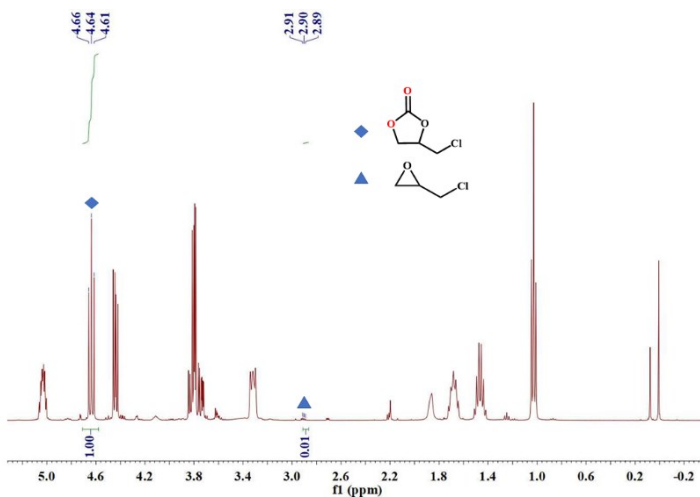

(e)  $^1\text{H}$  NMR spectrum of cyclic carbonate and epoxide with complex **1a** and TBAB (Table 2, entry 5).

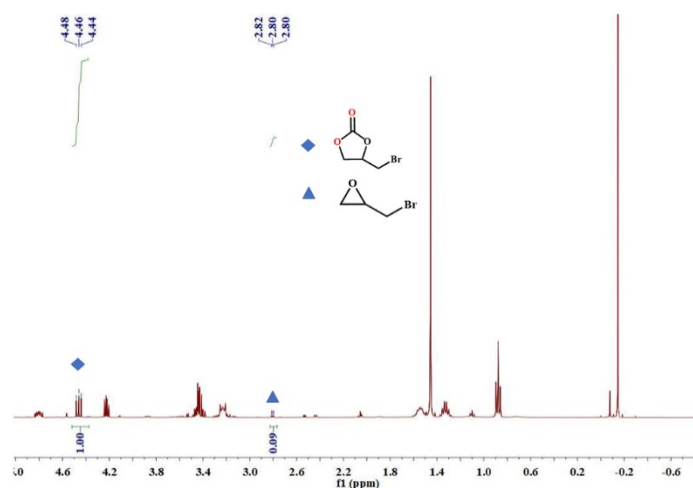

(f)  $^1\text{H}$  NMR spectrum of cyclic carbonate and epoxide with complex **1a** and TBAB (Table 2, entry 6).

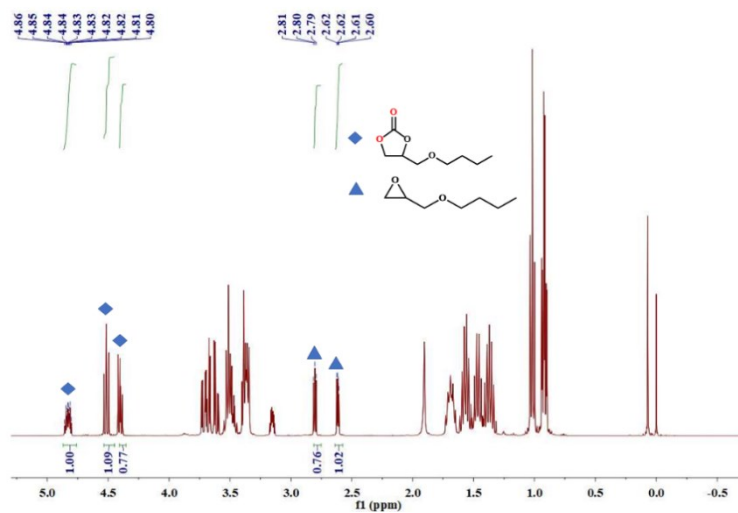

(g)  $^1\text{H}$  NMR spectrum of cyclic carbonate and epoxide with complex **1a** and TBAB (Table 2, entry 7).

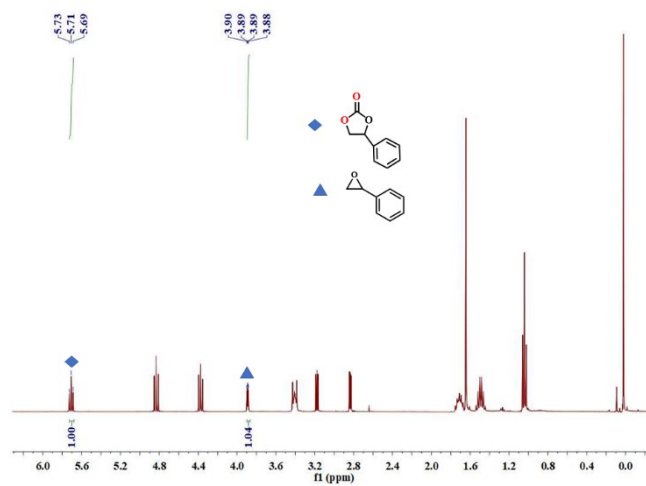

(h)  $^1\text{H}$  NMR spectrum of cyclic carbonate and epoxide with complex **1a** and TBAB (Table 2, entry 8).

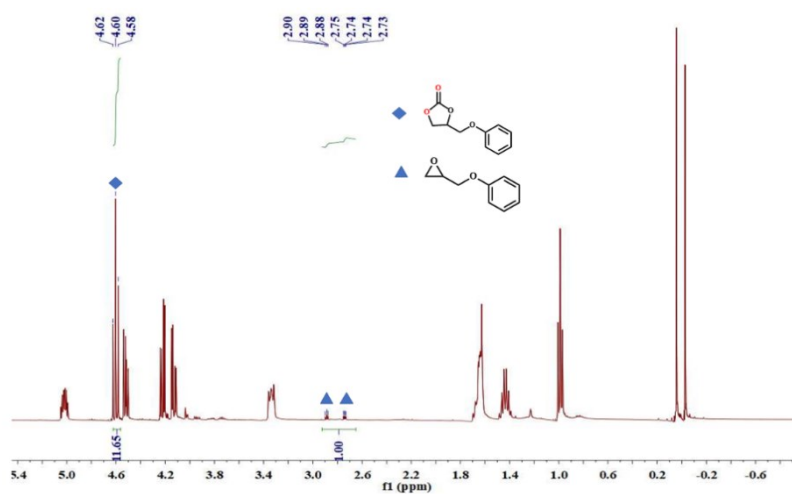

(i)  $^1\text{H}$  NMR spectrum of cyclic carbonate and epoxide with complex **1a** and TBAB (Table 2, entry 9).

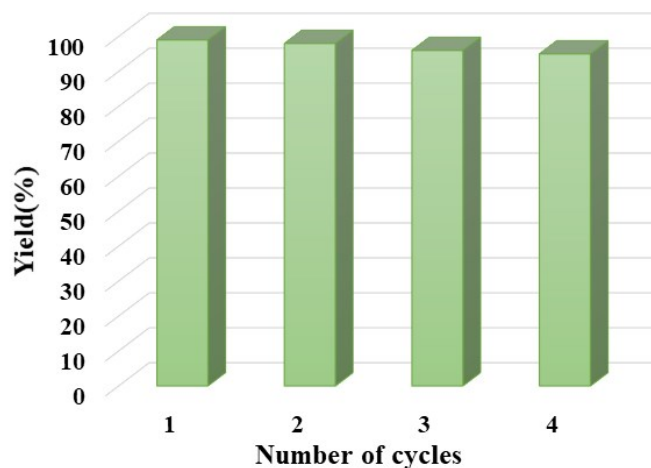

**Fig. S11** Cyclic experiment on the cycloaddition reaction of CO<sub>2</sub> and epichlorohydrin.

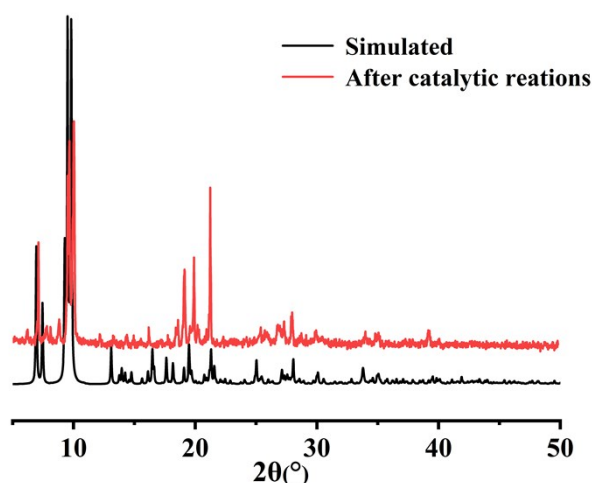

**Fig. S12** PXRD patterns of **1a** after four runs catalytic reactions.

## References

- 1 W. Q. Zhang, R. D. Wang, Z. B. Wu, Y. F. Kang, Y. P. Fan, X. Q. Liang, P. Liu and Y. Y. Wang, *Inorg. Chem.*, 2018, **57**, 1455-1463.
- 2 B. Liu, H. F. Zhou, L. Hou, Z. Zhu and Y. Y. Wang, *Inorg. Chem. Front.*, 2016, **3**, 1326-1331.
- 3 G. Verma, S. Kumar, T. Pham, Z. Niu, L. Wojtas, J. A. Perman and S. Ma, *Cryst. Growth Des.*, 2017, **17**, 2711-2717.
- 4 Z. Zhang, Z. Li and J. Li, *Langmuir*, 2012, **28**, 12122-12133.
- 5 S. D. Burd, S. Ma, J. A. Perman, B. J. Sikora, R. Q. Snurr, P. K. Thallapally, J. Tian, L. Wojtas and M. J. Zaworotko, *J. Am. Chem. Soc.*, 2012, **134**, 3663-3666.
- 6 P. Nugent, V. Rhodus, T. Pham, B. Tudor, K. Forrest, L. Wojtas, B. Space and M. Zaworotko, *Chem. Commun.*, 2013, **49**, 1606-1608.
- 7 H. He, F. Sun, S. Ma and G. Zhu, *Inorg. Chem.*, 2016, **55**, 9071-9076.
- 8 Y. Xiong, Y. Z. Fan, R. Yang, S. Chen, M. Pan, J. J. Jiang and C. Y. Su, *Chem. Commun.*, 2014, **50**, 14631-14634.
